# Supplementary material for: Distinct Expression Patterns of VEGFR 1-3 in Gastroenteropancreatic Neuroendocrine Neoplasms: Supporting Clinical Relevance, but not a Prognostic Factor
Source: MDPI journal article supplement (doi:10.3390/jcm9103368), 2020-10-21
Supplement: s1 [file s1]

**Supplementary table 1.** Overview of the four grades of immunohistochemical staining for VEGFR 1-3.

| <b>Receptor</b> | <b>Grading</b>      | <b>n</b> | <b>%</b> |
|-----------------|---------------------|----------|----------|
| VEGFR 1         | Negative            | 39       | 15.7     |
|                 | Weakly positive     | 63       | 25.3     |
|                 | Moderately positive | 90       | 36.1     |
|                 | Strongly positive   | 57       | 22.9     |
| VEGFR 2         | Negative            | 189      | 75.9     |
|                 | Weakly positive     | 44       | 17.7     |
|                 | Moderately positive | 15       | 6.0      |
|                 | Strongly positive   | 1        | 0.4      |
| VEGFR 3         | Negative            | 24       | 9.6      |
|                 | Weakly positive     | 71       | 28.5     |
|                 | Moderately positive | 100      | 40.2     |
|                 | Strongly positive   | 54       | 21.7     |
